# Supplementary material for: High Inter-Rater Reliability of Manual Segmentation and Volume-Based Tractography in Healthy and Dystrophic Human Calf Muscle
Source: MDPI journal article supplement (doi:10.3390/diagnostics11091521), 2021-08-24
Supplement: s1 [file s1]

**Table S1:** Overview of intraclass correlation coefficient (ICC) for segmentation techniques with varying fat fractions (FF) in neuromuscular patients. MSB = manual segmentation-based analysis, VBT = volume-based tractography.

|            |             | FF < 0.1 | FF 0.1 – 0.3 | FF > 0.3 |
|------------|-------------|----------|--------------|----------|
| <b>MSB</b> | FA          | 0.993    | 0.993        | 0.995    |
|            | MD          | 0.991    | 0.993        | 0.993    |
|            | $\lambda_1$ | 0.984    | 0.994        | 0.992    |
|            | RD          | 0.992    | 0.991        | 0.994    |
| <b>VBT</b> | FA          | 0.991    | 0.993        | 0.991    |
|            | MD          | 0.975    | 0.983        | 0.994    |
|            | $\lambda_1$ | 0.973    | 0.979        | 0.990    |
|            | RD          | 0.979    | 0.985        | 0.994    |
